# Supplementary material for: Theoretical study of the fluorination effect on charge transport properties in fused thiophene derivatives
Source: Royal Society of Chemistry journal article supplement (doi:10.1039/c5ra06418j), 2015-01-01
Supplement: c5ra06418j1.pdf [file c5ra06418j1.pdf]

## *Supporting Information*

### *Contents*

**Table S1.** The crystal structure data of the four compounds from the Cambridge Crystallographic Database

**Table S2.** The crystal structure data of the optimized four compounds and the predicted two compounds

**Table S3.** The optimized bond length (in Å), bond angle (°) and dihedral angles (°) of **DP-DTT** in the neutral and ionic states together with experimental values at the B3LYP/6-311G(d,p) level

**Table S4.** The optimized bond length (in Å), bond angle (°) and dihedral angles (°) of **FPP-DTT** in the neutral and ionic states together with experimental values at the B3LYP/6-311G(d,p) level

**Table S5.** The optimized bond length (in Å), bond angle (°) and dihedral angles (°) of **DFP-DTT** in the neutral and ionic states at the B3LYP/6-311G(d,p) level

**Table S6.** The optimized bond length (in Å), bond angle (°) and dihedral angles (°) of **DP-BDTT** in the neutral and ionic states together with experimental values at the B3LYP/6-311G(d,p) level

**Table S7.** The optimized bond length (in Å), bond angle (°) and dihedral angles (°) of **FPP-BDTT** in the neutral and ionic states together with experimental values at the B3LYP/6-311G(d,p) level

**Table S8.** The optimized bond length (in Å), bond angle (°) and dihedral angles (°) of **DFP-BDTT** in the neutral and ionic states together at the B3LYP/6-311G(d,p) level

**Figure S1.** The crystal structures of the studied six compounds

**Figure S2.** The absolute values of bond length changes between the neutral and ionized geometries of the **DTT** derivatives

**Figure S3.** The absolute values of bond length changes between the neutral and ionized geometries of the **BDTT** derivatives

**Figure S4.** Contribution (%) of part atom to their HOMOs and LUMOs for compounds **DP-DTT** and **DFP-DTT**

**Figure S5.** The simulated hole and electron anisotropic mobilities in the *a-b* plane of **DP-BDTT**.

**Figure S6.** The simulated hole and electron anisotropic mobilities in the *a-b* plane of **FPP-BDTT**.

**Table S1.** The crystal structure data of the four compounds from the Cambridge Crystallographic Database <sup>a</sup>

| Compound | Space group | a/Å  | b/Å   | c/Å   | $\alpha$ /° | $\beta$ /° | $\gamma$ /° |
|----------|-------------|------|-------|-------|-------------|------------|-------------|
| DP-DTT   | P21/c       | 7.47 | 5.92  | 34.72 | 90.00       | 94.01      | 90.00       |
| DP-BDTT  | P-1         | 5.96 | 7.51  | 50.36 | 90.00       | 92.86      | 90.00       |
| FPP-DTT  | P21/c       | 5.87 | 36.12 | 7.50  | 90.00       | 91.67      | 90.00       |
| FPP-BDTT | P-1         | 3.83 | 5.83  | 26.04 | 86.15       | 87.92      | 87.04       |

<sup>a</sup> The data are based on the experimental crystal structure from CCDC No.1005153–1005156.

**Table S2.** The crystal structure data of the optimized four compounds and the predicted two compounds

| Compound              | Space group | a/Å  | b/Å   | c/Å   | $\alpha$ /° | $\beta$ /° | $\gamma$ /° |
|-----------------------|-------------|------|-------|-------|-------------|------------|-------------|
| DP-DTT <sup>a</sup>   | P21/c       | 7.75 | 5.24  | 33.28 | 90.00       | 96.59      | 90.00       |
| DP-BDTT               | P-1         | 5.55 | 7.57  | 47.79 | 90.00       | 91.25      | 90.00       |
| FPP-DTT               | P21/c       | 5.62 | 35.60 | 7.03  | 90.00       | 89.66      | 90.00       |
| FPP-BDTT <sup>b</sup> | P-1         | 3.59 | 5.64  | 25.23 | 86.34       | 87.89      | 90.34       |
| DFP-DTT               | P21/c       | 6.15 | 36.88 | 7.41  | 90.00       | 83.06      | 90.00       |
| DFP-BDTT              | P-1         | 3.69 | 5.84  | 26.17 | 86.15       | 88.85      | 87.58       |

<sup>a</sup> the optimized crystal structures based on the experimental crystallizes

<sup>b</sup> the predicted crystal structures based on the precursor crystallizes FPP-DTT and FPP-BDTT

**Table S3.** The optimized bond length (in Å), bond angle (°) and dihedral angles (°) of **DP-DTT** in the neutral and ionic states together with experimental values at the B3LYP/6-311G(d,p) level

|          | Ground state | Expt. | Anion state | Cation state |
|----------|--------------|-------|-------------|--------------|
| R(1,2)   | 1.087        | 0.951 | 1.089       | 1.085        |
| R(2,3)   | 1.392        | 1.370 | 1.387       | 1.387        |
| R(3,4)   | 1.086        | 0.953 | 1.086       | 1.085        |
| R(3,5)   | 1.408        | 1.411 | 1.425       | 1.417        |
| R(5,6)   | 1.466        | 1.435 | 1.436       | 1.446        |
| R(6,7)   | 1.378        | 1.395 | 1.404       | 1.404        |
| R(7,8)   | 1.418        | 1.399 | 1.394       | 1.390        |
| R(8,9)   | 1.761        | 1.754 | 1.777       | 1.760        |
| R(9,10)  | 1.761        | 1.763 | 1.777       | 1.760        |
| R(10,11) | 1.418        | 1.393 | 1.394       | 1.390        |
| R(11,12) | 1.378        | 1.380 | 1.404       | 1.404        |
| R(12,13) | 1.466        | 1.460 | 1.436       | 1.446        |
| R(13,14) | 1.408        | 1.412 | 1.425       | 1.417        |
| R(14,15) | 1.086        | 0.950 | 1.086       | 1.085        |
| R(14,16) | 1.392        | 1.369 | 1.387       | 1.387        |
| R(16,17) | 1.087        | 0.951 | 1.089       | 1.085        |
| R(16,18) | 1.397        | 1.396 | 1.402       | 1.400        |
| R(18,19) | 1.086        | 0.950 | 1.087       | 1.086        |
| R(18,20) | 1.396        | 1.385 | 1.400       | 1.400        |
| R(20,21) | 1.087        | 0.949 | 1.089       | 1.085        |
| R(20,23) | 1.393        | 1.372 | 1.389       | 1.387        |
| R(22,23) | 1.087        | 0.951 | 1.087       | 1.086        |
| R(13,23) | 1.407        | 1.394 | 1.423       | 1.415        |
| R(12,24) | 1.773        | 1.767 | 1.800       | 1.774        |
| R(24,25) | 1.739        | 1.734 | 1.755       | 1.740        |

|                    |        |        |        |        |
|--------------------|--------|--------|--------|--------|
| R(25,26)           | 1.418  | 1.392  | 1.395  | 1.388  |
| R(26,27)           | 1.739  | 1.748  | 1.755  | 1.740  |
| R(6,27)            | 1.773  | 1.759  | 1.800  | 1.774  |
| R(5,28)            | 1.407  | 1.405  | 1.423  | 1.415  |
| R(28,29)           | 1.087  | 0.952  | 1.087  | 1.086  |
| R(28,30)           | 1.393  | 1.352  | 1.389  | 1.387  |
| R(30,31)           | 1.087  | 0.951  | 1.089  | 1.085  |
| R(30,32)           | 1.396  | 1.407  | 1.400  | 1.400  |
| R(32,33)           | 1.086  | 0.950  | 1.087  | 1.086  |
| R(2,32)            | 1.397  | 1.379  | 1.402  | 1.400  |
| R(8,26)            | 1.394  | 1.371  | 1.413  | 1.423  |
| R(10,25)           | 1.394  | 1.368  | 1.413  | 1.423  |
| A(H4-C3-C5)        | 119.50 | 119.58 | 119.39 | 120.27 |
| A(H15-C14-C13)     | 119.50 | 119.08 | 119.39 | 120.27 |
| D(C7-C6-C5-C28)    | 179.19 | 172.95 | 167.78 | 179.96 |
| D(C11-C12-C13-C23) | 179.20 | 173.16 | 167.64 | 179.98 |

---

**Table S4.** The optimized bond length (in Å), bond angle (°) and dihedral angles (°) of **FPP-DTT** in the neutral and ionic states together with experimental values at the B3LYP/6-311G(d,p) level

|          | Ground state | Expt. | Anion state | Cation state |
|----------|--------------|-------|-------------|--------------|
| R(1,2)   | 1.087        | 1.119 | 1.089       | 1.085        |
| R(2,3)   | 1.392        | 1.382 | 1.388       | 1.386        |
| R(3,4)   | 1.086        | 0.897 | 1.086       | 1.084        |
| R(3,5)   | 1.408        | 1.408 | 1.422       | 1.419        |
| R(5,6)   | 1.467        | 1.468 | 1.441       | 1.443        |
| R(6,7)   | 1.378        | 1.379 | 1.400       | 1.407        |
| R(7,8)   | 1.418        | 1.404 | 1.396       | 1.388        |
| R(8,9)   | 1.760        | 1.742 | 1.775       | 1.759        |
| R(9,10)  | 1.761        | 1.734 | 1.776       | 1.760        |
| R(10,11) | 1.412        | 1.410 | 1.390       | 1.390        |
| R(11,12) | 1.384        | 1.383 | 1.413       | 1.406        |
| R(12,13) | 1.412        | 1.461 | 1.390       | 1.390        |
| R(13,14) | 1.411        | 1.409 | 1.431       | 1.419        |
| R(14,15) | 1.345        | 1.349 | 1.357       | 1.338        |
| R(14,16) | 1.390        | 1.370 | 1.384       | 1.388        |
| R(16,17) | 1.337        | 1.335 | 1.349       | 1.329        |
| R(16,18) | 1.392        | 1.386 | 1.395       | 1.396        |
| R(18,19) | 1.335        | 1.330 | 1.351       | 1.322        |
| R(18,20) | 1.391        | 1.377 | 1.395       | 1.396        |
| R(20,21) | 1.337        | 1.345 | 1.349       | 1.328        |
| R(20,23) | 1.390        | 1.374 | 1.384       | 1.387        |
| R(22,23) | 1.345        | 1.354 | 1.356       | 1.340        |
| R(13,23) | 1.384        | 1.403 | 1.413       | 1.406        |
| R(12,24) | 1.781        | 1.756 | 1.808       | 1.778        |
| R(24,25) | 1.734        | 1.722 | 1.750       | 1.738        |

|                    |        |        |        |        |
|--------------------|--------|--------|--------|--------|
| R(25,26)           | 1.418  | 1.417  | 1.396  | 1.389  |
| R(26,27)           | 1.739  | 1.722  | 1.753  | 1.739  |
| R(6,27)            | 1.772  | 1.748  | 1.796  | 1.775  |
| R(5,28)            | 1.407  | 1.403  | 1.420  | 1.417  |
| R(28,29)           | 1.087  | 0.953  | 1.087  | 1.086  |
| R(28,30)           | 1.393  | 1.388  | 1.390  | 1.386  |
| R(30,31)           | 1.087  | 0.864  | 1.089  | 1.085  |
| R(30,32)           | 1.396  | 1.388  | 1.399  | 1.401  |
| R(32,33)           | 1.086  | 0.983  | 1.087  | 1.086  |
| R(2,32)            | 1.397  | 1.401  | 1.401  | 1.400  |
| R(8,26)            | 1.395  | 1.394  | 1.412  | 1.426  |
| R(10,25)           | 1.394  | 1.393  | 1.412  | 1.420  |
| A(H4-C3-C5)        | 119.52 | 120.33 | 119.47 | 120.34 |
| A(H15-C14-C13)     | 120.58 | 119.85 | 120.30 | 120.84 |
| D(C7-C6-C5-C28)    | 179.44 | 179.14 | 171.66 | 179.98 |
| D(C11-C12-C13-C23) | 179.47 | 177.98 | 173.65 | 179.98 |

---

**Table S5.** The optimized bond length (in Å), bond angle (°) and dihedral angles (°) of **DFP-DTT** in the neutral and ionic states at the B3LYP/6-311G(d,p) level

|          | Ground state | Anion state | Cation state |
|----------|--------------|-------------|--------------|
| R(1,2)   | 1.337        | 1.348       | 1.328        |
| R(2,3)   | 1.390        | 1.385       | 1.387        |
| R(3,4)   | 1.344        | 1.355       | 1.337        |
| R(3,5)   | 1.411        | 1.428       | 1.420        |
| R(5,6)   | 1.465        | 1.434       | 1.449        |
| R(6,7)   | 1.384        | 1.410       | 1.409        |
| R(7,8)   | 1.413        | 1.391       | 1.388        |
| R(8,9)   | 1.760        | 1.774       | 1.760        |
| R(9,10)  | 1.760        | 1.774       | 1.760        |
| R(10,11) | 1.413        | 1.391       | 1.388        |
| R(11,12) | 1.384        | 1.410       | 1.409        |
| R(12,13) | 1.465        | 1.434       | 1.449        |
| R(13,14) | 1.411        | 1.428       | 1.420        |
| R(14,15) | 1.344        | 1.355       | 1.337        |
| R(14,16) | 1.390        | 1.385       | 1.387        |
| R(16,17) | 1.337        | 1.348       | 1.328        |
| R(16,18) | 1.392        | 1.394       | 1.397        |
| R(18,19) | 1.334        | 1.349       | 1.320        |
| R(18,20) | 1.391        | 1.394       | 1.397        |
| R(20,21) | 1.337        | 1.347       | 1.327        |
| R(20,23) | 1.390        | 1.385       | 1.386        |
| R(22,23) | 1.345        | 1.354       | 1.339        |
| R(13,23) | 1.408        | 1.425       | 1.417        |
| R(12,24) | 1.780        | 1.805       | 1.779        |
| R(24,25) | 1.734        | 1.749       | 1.738        |



|                    |        |        |        |
|--------------------|--------|--------|--------|
| R(25,26)           | 1.418  | 1.396  | 1.388  |
| R(26,27)           | 1.734  | 1.749  | 1.738  |
| R(6,27)            | 1.780  | 1.805  | 1.779  |
| R(5,28)            | 1.408  | 1.425  | 1.417  |
| R(28,29)           | 1.345  | 1.354  | 1.339  |
| R(28,30)           | 1.390  | 1.385  | 1.386  |
| R(30,31)           | 1.337  | 1.347  | 1.327  |
| R(30,32)           | 1.391  | 1.394  | 1.397  |
| R(32,33)           | 1.334  | 1.349  | 1.320  |
| R(2,32)            | 1.392  | 1.394  | 1.397  |
| R(8,26)            | 1.395  | 1.412  | 1.423  |
| R(10,25)           | 1.395  | 1.412  | 1.423  |
| A(H4-C3-C5)        | 120.58 | 120.40 | 120.84 |
| A(H15-C14-C13)     | 120.57 | 120.40 | 120.85 |
| D(C7-C6-C5-C28)    | 177.87 | 174.99 | 179.98 |
| D(C11-C12-C13-C23) | 177.67 | 175.03 | 179.95 |

---

**Table S6.** The optimized bond length (in Å), bond angle (°) and dihedral angles (°) of **DP-BDTT** in the neutral and ionic states together with experimental values at the B3LYP/6-311G(d,p) level

|          | Ground state | Expt. | Anion state | Cation state |
|----------|--------------|-------|-------------|--------------|
| R(1,2)   | 1.087        | 0.930 | 1.088       | 1.086        |
| R(2,3)   | 1.392        | 1.392 | 1.389       | 1.390        |
| R(3,4)   | 1.086        | 0.930 | 1.086       | 1.085        |
| R(3,5)   | 1.408        | 1.394 | 1.418       | 1.412        |
| R(5,6)   | 1.466        | 1.476 | 1.448       | 1.457        |
| R(6,7)   | 1.378        | 1.375 | 1.393       | 1.392        |
| R(7,8)   | 1.417        | 1.419 | 1.401       | 1.401        |
| R(8,9)   | 1.760        | 1.730 | 1.771       | 1.759        |
| R(9,10)  | 1.760        | 1.752 | 1.771       | 1.760        |
| R(10,11) | 1.416        | 1.411 | 1.398       | 1.391        |
| R(11,12) | 1.381        | 1.360 | 1.405       | 1.405        |
| R(12,13) | 1.443        | 1.443 | 1.411       | 1.413        |
| R(13,14) | 1.775        | 1.764 | 1.796       | 1.781        |
| R(14,15) | 1.741        | 1.704 | 1.754       | 1.738        |
| R(15,16) | 1.417        | 1.456 | 1.400       | 1.396        |
| R(16,17) | 1.740        | 1.728 | 1.748       | 1.741        |
| R(17,18) | 1.773        | 1.749 | 1.790       | 1.771        |
| R(18,19) | 1.466        | 1.471 | 1.448       | 1.457        |
| R(19,21) | 1.407        | 1.401 | 1.416       | 1.410        |
| R(21,22) | 1.087        | 0.931 | 1.087       | 1.087        |
| R(21,23) | 1.393        | 1.388 | 1.391       | 1.390        |
| R(22,23) | 1.087        | 0.931 | 1.088       | 1.086        |
| R(23,24) | 1.396        | 1.375 | 1.398       | 1.398        |
| R(24,25) | 1.086        | 0.927 | 1.087       | 1.086        |
| R(24,26) | 1.397        | 1.372 | 1.400       | 1.398        |

|                 |        |        |        |        |
|-----------------|--------|--------|--------|--------|
| R(26,27)        | 1.087  | 0.933  | 1.088  | 1.086  |
| R(26,28)        | 1.392  | 1.384  | 1.389  | 1.390  |
| R(28,29)        | 1.086  | 0.930  | 1.086  | 1.085  |
| R(19,28)        | 1.408  | 1.369  | 1.418  | 1.412  |
| R(18,30)        | 1.378  | 1.370  | 1.393  | 1.392  |
| R(30,31)        | 1.418  | 1.445  | 1.401  | 1.401  |
| R(31,32)        | 1.760  | 1.734  | 1.771  | 1.759  |
| R(32,33)        | 1.760  | 1.759  | 1.771  | 1.760  |
| R(33,34)        | 1.416  | 1.428  | 1.398  | 1.391  |
| R(13,34)        | 1.381  | 1.360  | 1.405  | 1.405  |
| R(12,35)        | 1.775  | 1.747  | 1.796  | 1.781  |
| R(35,36)        | 1.741  | 1.731  | 1.754  | 1.738  |
| R(36,37)        | 1.417  | 1.425  | 1.400  | 1.396  |
| R(37,38)        | 1.740  | 1.728  | 1.748  | 1.741  |
| R(6,38)         | 1.773  | 1.757  | 1.790  | 1.771  |
| R(5,40)         | 1.407  | 1.372  | 1.416  | 1.410  |
| R(40,39)        | 1.087  | 0.930  | 1.087  | 1.087  |
| R(40,42)        | 1.393  | 1.391  | 1.391  | 1.390  |
| R(41,42)        | 1.087  | 0.932  | 1.088  | 1.086  |
| R(42,43)        | 1.396  | 1.374  | 1.398  | 1.398  |
| R(43,44)        | 1.086  | 0.932  | 1.087  | 1.086  |
| R(2,43)         | 1.397  | 1.396  | 1.400  | 1.398  |
| R(8,37)         | 1.395  | 1.408  | 1.407  | 1.412  |
| R(10,36)        | 1.395  | 1.382  | 1.408  | 1.419  |
| R(15,33)        | 1.395  | 1.375  | 1.408  | 1.419  |
| R(16,31)        | 1.395  | 1.381  | 1.407  | 1.412  |
| A(H4-C3-C5)     | 119.50 | 119.96 | 119.59 | 120.00 |
| A(H20-C21-C19)  | 119.64 | 119.71 | 119.48 | 120.01 |
| D(C7-C6-C5-C40) | 179.62 | 172.44 | 157.03 | 179.57 |

|                    |        |        |        |        |
|--------------------|--------|--------|--------|--------|
| D(C21-C19-C18-C30) | 179.91 | 173.07 | 157.02 | 179.90 |
| D(C11-C12-C13-C34) | 179.87 | 179.32 | 179.91 | 179.97 |

---

**Table S7.** The optimized bond length (in Å), bond angle (°) and dihedral angles (°) of **FPP-BDTT** in the neutral and ionic states together with experimental values at the B3LYP/6-311G(d,p) level

|          | Ground state | Expt. | Anion state | Cation state |
|----------|--------------|-------|-------------|--------------|
| R(1,2)   | 1.087        | 1.326 | 1.088       | 1.086        |
| R(2,3)   | 1.392        | 1.369 | 1.390       | 1.389        |
| R(3,4)   | 1.086        | 1.362 | 1.086       | 1.085        |
| R(3,5)   | 1.408        | 1.389 | 1.416       | 1.412        |
| R(5,6)   | 1.466        | 1.465 | 1.452       | 1.455        |
| R(6,7)   | 1.378        | 1.365 | 1.390       | 1.394        |
| R(7,8)   | 1.417        | 1.411 | 1.404       | 1.400        |
| R(8,9)   | 1.760        | 1.729 | 1.769       | 1.759        |
| R(9,10)  | 1.760        | 1.745 | 1.769       | 1.760        |
| R(10,11) | 1.415        | 1.406 | 1.400       | 1.390        |
| R(11,12) | 1.381        | 1.369 | 1.403       | 1.406        |
| R(12,13) | 1.443        | 1.447 | 1.412       | 1.413        |
| R(13,14) | 1.775        | 1.749 | 1.794       | 1.780        |
| R(14,15) | 1.741        | 1.719 | 1.754       | 1.737        |
| R(15,16) | 1.416        | 1.424 | 1.398       | 1.399        |
| R(16,17) | 1.734        | 1.722 | 1.744       | 1.737        |
| R(17,18) | 1.781        | 1.758 | 1.800       | 1.778        |
| R(18,19) | 1.464        | 1.465 | 1.440       | 1.460        |
| R(19,21) | 1.409        | 1.402 | 1.421       | 1.412        |
| R(21,22) | 1.345        | 1.338 | 1.352       | 1.342        |
| R(21,23) | 1.390        | 1.365 | 1.387       | 1.389        |
| R(22,23) | 1.337        | 1.314 | 1.345       | 1.331        |
| R(23,24) | 1.391        | 1.382 | 1.392       | 1.393        |
| R(24,25) | 1.335        | 1.289 | 1.346       | 1.326        |
| R(24,26) | 1.392        | 1.372 | 1.393       | 1.394        |

|                 |        |        |        |        |
|-----------------|--------|--------|--------|--------|
| R(26,27)        | 1.337  | 1.326  | 1.345  | 1.331  |
| R(26,28)        | 1.390  | 1.369  | 1.386  | 1.389  |
| R(28,29)        | 1.345  | 1.362  | 1.353  | 1.341  |
| R(19,28)        | 1.411  | 1.389  | 1.424  | 1.414  |
| R(18,30)        | 1.384  | 1.365  | 1.404  | 1.395  |
| R(30,31)        | 1.412  | 1.411  | 1.394  | 1.401  |
| R(31,32)        | 1.761  | 1.729  | 1.772  | 1.759  |
| R(32,33)        | 1.759  | 1.746  | 1.770  | 1.759  |
| R(33,34)        | 1.415  | 1.406  | 1.396  | 1.391  |
| R(13,34)        | 1.382  | 1.369  | 1.405  | 1.405  |
| R(12,35)        | 1.775  | 1.749  | 1.795  | 1.781  |
| R(35,36)        | 1.741  | 1.719  | 1.753  | 1.739  |
| R(36,37)        | 1.417  | 1.424  | 1.402  | 1.394  |
| R(37,38)        | 1.740  | 1.722  | 1.747  | 1.741  |
| R(6,38)         | 1.773  | 1.758  | 1.788  | 1.771  |
| R(5,40)         | 1.407  | 1.402  | 1.414  | 1.411  |
| R(40,39)        | 1.087  | 1.338  | 1.087  | 1.087  |
| R(40,42)        | 1.393  | 1.365  | 1.391  | 1.390  |
| R(41,42)        | 1.087  | 1.314  | 1.088  | 1.086  |
| R(42,43)        | 1.396  | 1.382  | 1.397  | 1.398  |
| R(43,44)        | 1.086  | 1.289  | 1.087  | 1.086  |
| R(2,43)         | 1.397  | 1.372  | 1.399  | 1.398  |
| R(8,37)         | 1.395  | 1.393  | 1.405  | 1.414  |
| R(10,36)        | 1.396  | 1.382  | 1.406  | 1.421  |
| R(15,33)        | 1.396  | 1.382  | 1.411  | 1.418  |
| R(16,31)        | 1.395  | 1.393  | 1.409  | 1.408  |
| A(H4-C3-C5)     | 119.51 | 120.09 | 119.55 | 120.04 |
| A(H20-C21-C19)  | 120.08 | 118.77 | 119.79 | 119.88 |
| D(C7-C6-C5-C40) | 179.32 | 179.20 | 178.04 | 179.89 |

|                    |        |        |        |        |
|--------------------|--------|--------|--------|--------|
| D(C21-C19-C18-C30) | 177.94 | 179.19 | 175.92 | 178.32 |
| D(C11-C12-C13-C34) | 179.14 | 180.00 | 179.58 | 179.11 |

---

**Table S8.** The optimized bond length (in Å), bond angle (°) and dihedral angles (°) of **DFP-BDTP** in the neutral and ionic states at the B3LYP/6-311G(d,p) level

|          | Ground state | Anion state | Cation state |
|----------|--------------|-------------|--------------|
| R(1,2)   | 1.337        | 1.344       | 1.331        |
| R(2,3)   | 1.390        | 1.387       | 1.389        |
| R(3,4)   | 1.345        | 1.352       | 1.340        |
| R(3,5)   | 1.411        | 1.422       | 1.415        |
| R(5,6)   | 1.464        | 1.444       | 1.459        |
| R(6,7)   | 1.385        | 1.401       | 1.396        |
| R(7,8)   | 1.412        | 1.396       | 1.400        |
| R(8,9)   | 1.761        | 1.771       | 1.759        |
| R(9,10)  | 1.759        | 1.769       | 1.759        |
| R(10,11) | 1.415        | 1.397       | 1.390        |
| R(11,12) | 1.382        | 1.404       | 1.406        |
| R(12,13) | 1.442        | 1.413       | 1.413        |
| R(13,14) | 1.775        | 1.793       | 1.780        |
| R(14,15) | 1.741        | 1.753       | 1.737        |
| R(15,16) | 1.416        | 1.399       | 1.397        |
| R(16,17) | 1.734        | 1.743       | 1.737        |
| R(17,18) | 1.781        | 1.798       | 1.778        |
| R(18,19) | 1.464        | 1.444       | 1.459        |
| R(19,21) | 1.409        | 1.419       | 1.412        |
| R(21,22) | 1.345        | 1.351       | 1.342        |
| R(21,23) | 1.390        | 1.387       | 1.388        |
| R(22,23) | 1.337        | 1.344       | 1.331        |
| R(23,24) | 1.391        | 1.392       | 1.394        |
| R(24,25) | 1.334        | 1.345       | 1.325        |
| R(24,26) | 1.392        | 1.393       | 1.395        |



|                 |        |        |        |
|-----------------|--------|--------|--------|
| R(26,27)        | 1.337  | 1.344  | 1.331  |
| R(26,28)        | 1.390  | 1.387  | 1.389  |
| R(28,29)        | 1.345  | 1.352  | 1.340  |
| R(19,28)        | 1.411  | 1.422  | 1.415  |
| R(18,30)        | 1.385  | 1.401  | 1.396  |
| R(30,31)        | 1.412  | 1.396  | 1.400  |
| R(31,32)        | 1.761  | 1.771  | 1.759  |
| R(32,33)        | 1.759  | 1.769  | 1.759  |
| R(33,34)        | 1.415  | 1.397  | 1.390  |
| R(13,34)        | 1.382  | 1.404  | 1.406  |
| R(12,35)        | 1.775  | 1.793  | 1.780  |
| R(35,36)        | 1.741  | 1.753  | 1.737  |
| R(36,37)        | 1.416  | 1.399  | 1.397  |
| R(37,38)        | 1.734  | 1.743  | 1.737  |
| R(6,38)         | 1.781  | 1.798  | 1.778  |
| R(5,40)         | 1.409  | 1.419  | 1.412  |
| R(40,39)        | 1.345  | 1.351  | 1.342  |
| R(40,42)        | 1.390  | 1.387  | 1.388  |
| R(41,42)        | 1.337  | 1.344  | 1.331  |
| R(42,43)        | 1.391  | 1.392  | 1.394  |
| R(43,44)        | 1.334  | 1.345  | 1.325  |
| R(2,43)         | 1.392  | 1.393  | 1.395  |
| R(8,37)         | 1.395  | 1.408  | 1.410  |
| R(10,36)        | 1.396  | 1.409  | 1.420  |
| R(15,33)        | 1.396  | 1.409  | 1.420  |
| R(16,31)        | 1.395  | 1.408  | 1.410  |
| A(H4-C3-C5)     | 120.60 | 120.55 | 120.75 |
| A(H20-C21-C19)  | 120.06 | 119.86 | 119.85 |
| D(C7-C6-C5-C40) | 178.46 | 175.59 | 177.97 |

|                    |        |        |        |
|--------------------|--------|--------|--------|
| D(C21-C19-C18-C30) | 178.46 | 175.59 | 177.97 |
| D(C11-C12-C13-C34) | 180.00 | 180.00 | 180.00 |

---

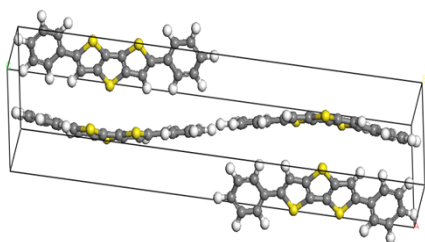

**DP-DTT**

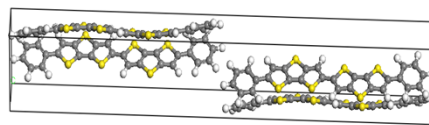

**DP-BDTT**

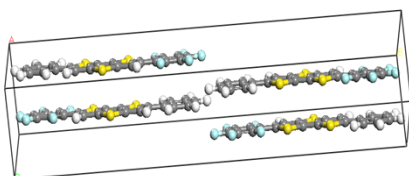

**FPP-DTT**

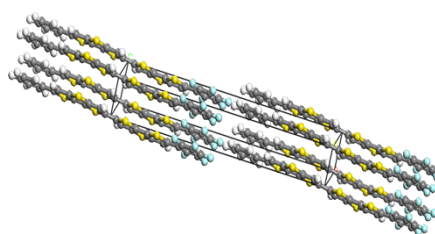

**FPP-BDTT**

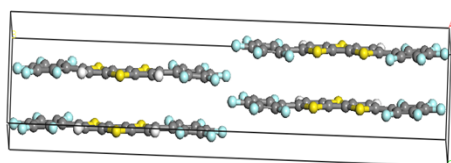

**DFP-DTT**

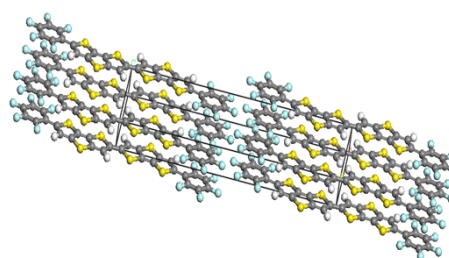

**DFP-BDTT**

**Figure S1.** The crystal structures of the studied six compounds

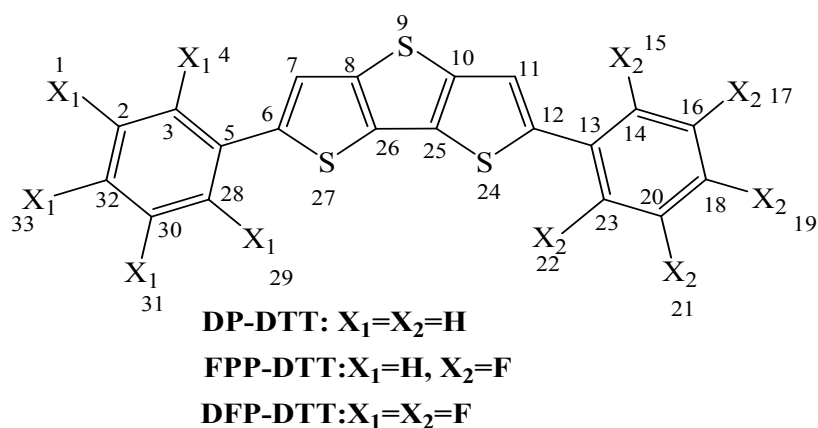

(a)

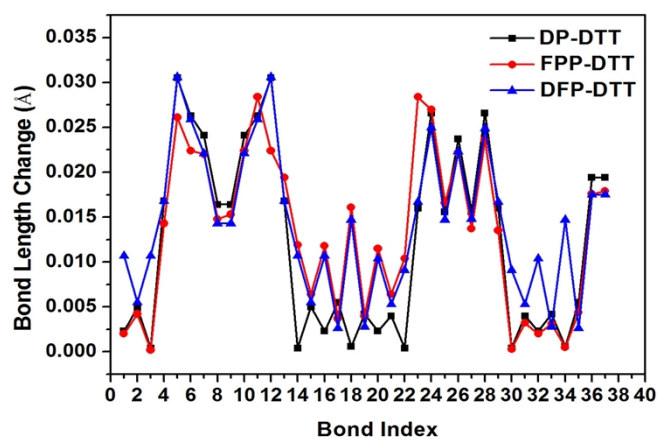

(b)

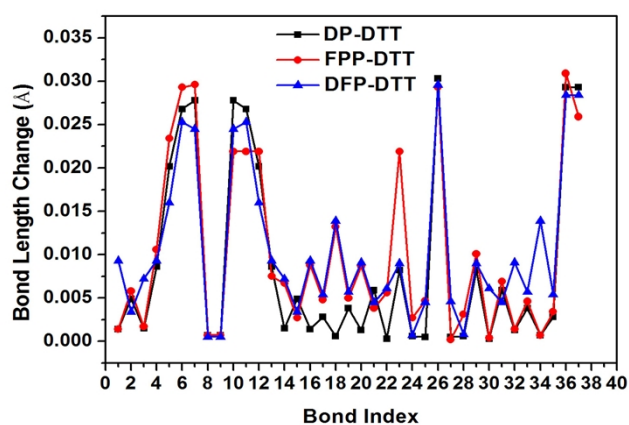

(c)

**Figure S2.** (a) The bond index of the bond lengths; the absolute values of bond length changes between the neutral and ionized geometries, (b) for hole and (c) for electron of the **DTT** derivatives

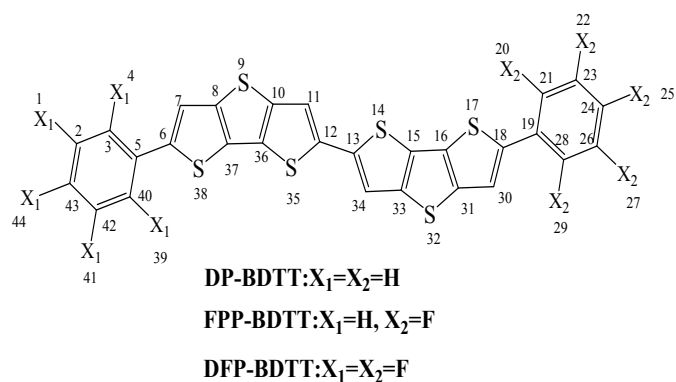

(a)

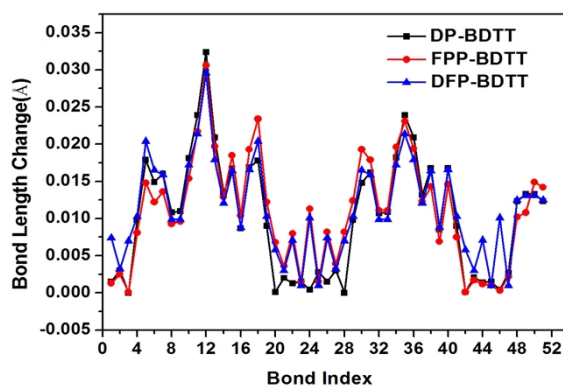

(b)

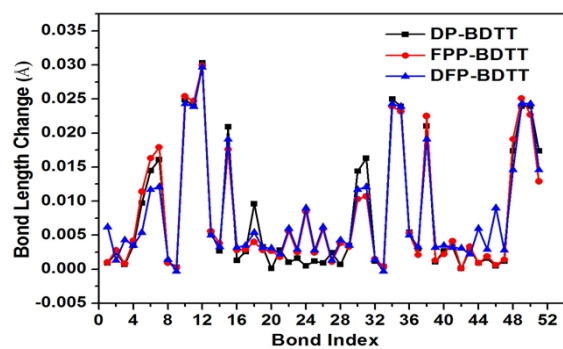

(c)

**Figure S3.** (a) The bond index of the bond lengths; the absolute values of bond length changes between the neutral and ionized geometries, (b) for hole and (c) for electron of the **BDTT** derivatives

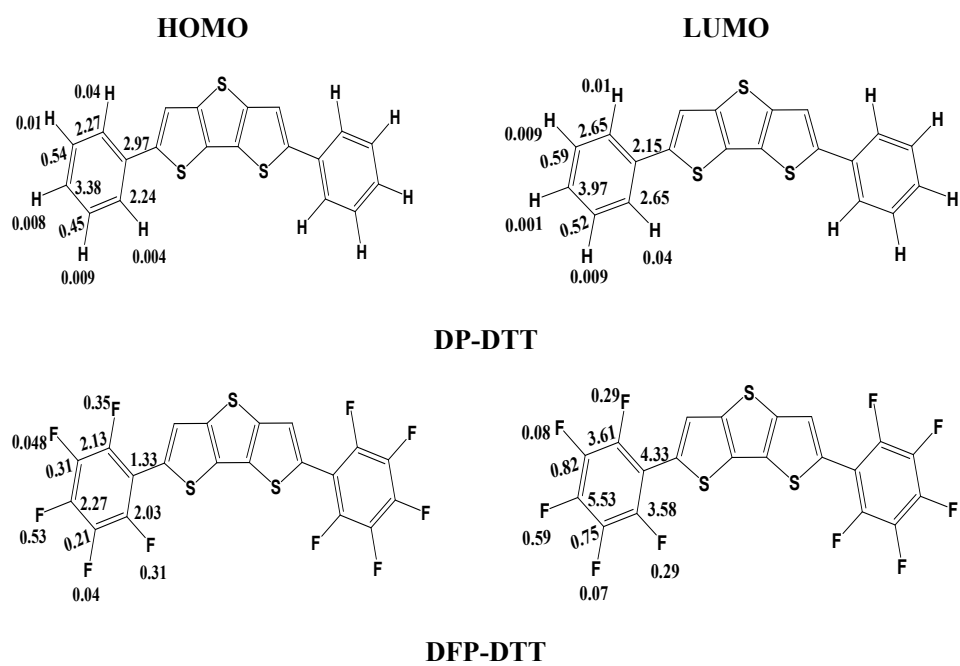

**Figure S4.** Contribution (%) of part atom to their HOMOs and LUMOs for compounds **DP-DTT** and **DFP-DTT**

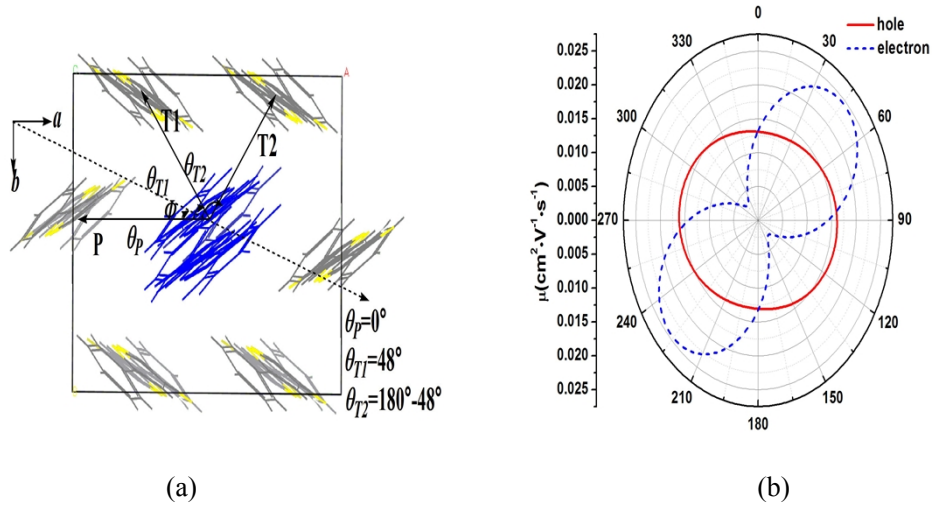

**Figure S5.** (a) Illustration of projecting different hopping pathways to a transistor channel in  $a$ - $b$  plane of DP-BDFT crystal;  $\theta_P$ ,  $\theta_{T1}$  and  $\theta_{T2}$  are the angles of P, T1 and T2 dimers relative to the reference crystallographic axis  $a$ .  $\Phi$  is the angle along a transistor channel relative to the reference crystallographic axis  $a$ . (b) the simulated hole and electron anisotropic mobilities in the  $a$ - $b$  plane of DP-BDFT.

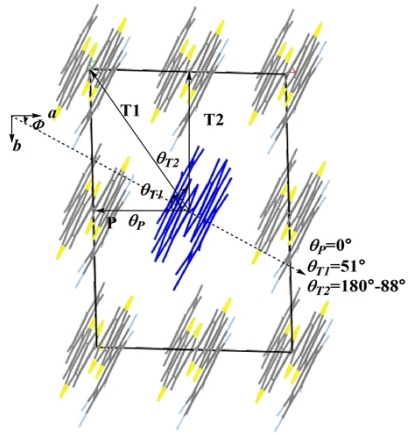

(a)

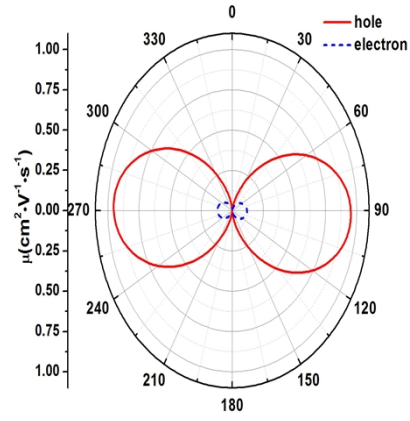

(b)

**Figure S6.** (a) Illustration of projecting different hopping pathways to a transistor channel in  $a$ - $b$  plane of **FPP-BDIT** crystal;  $\theta_P$ ,  $\theta_{T1}$  and  $\theta_{T2}$  are the angles of P, T1 and T2 dimers relative to the reference crystallographic axis  $a$ .  $\Phi$  is the angle along a transistor channel relative to the reference crystallographic axis  $a$ . (b) and (c) the simulated hole and electron anisotropic mobilities in the  $a$ - $b$  plane of **FPP-BDIT**.
